# Supplementary material for: Metabolic consequences of HIF silencing in a triple negative human breast cancer xenograft
Source: PubMed Central journal article supplement (PMC5880607; doi:10.18632/oncotarget.24569), 2018-02-24
Supplement: oncotarget-09-15326-s001.pdf [file oncotarget-09-15326-s001.pdf]

## Metabolic consequences of HIF silencing in a triple negative human breast cancer xenograft

### SUPPLEMENTARY MATERIALS

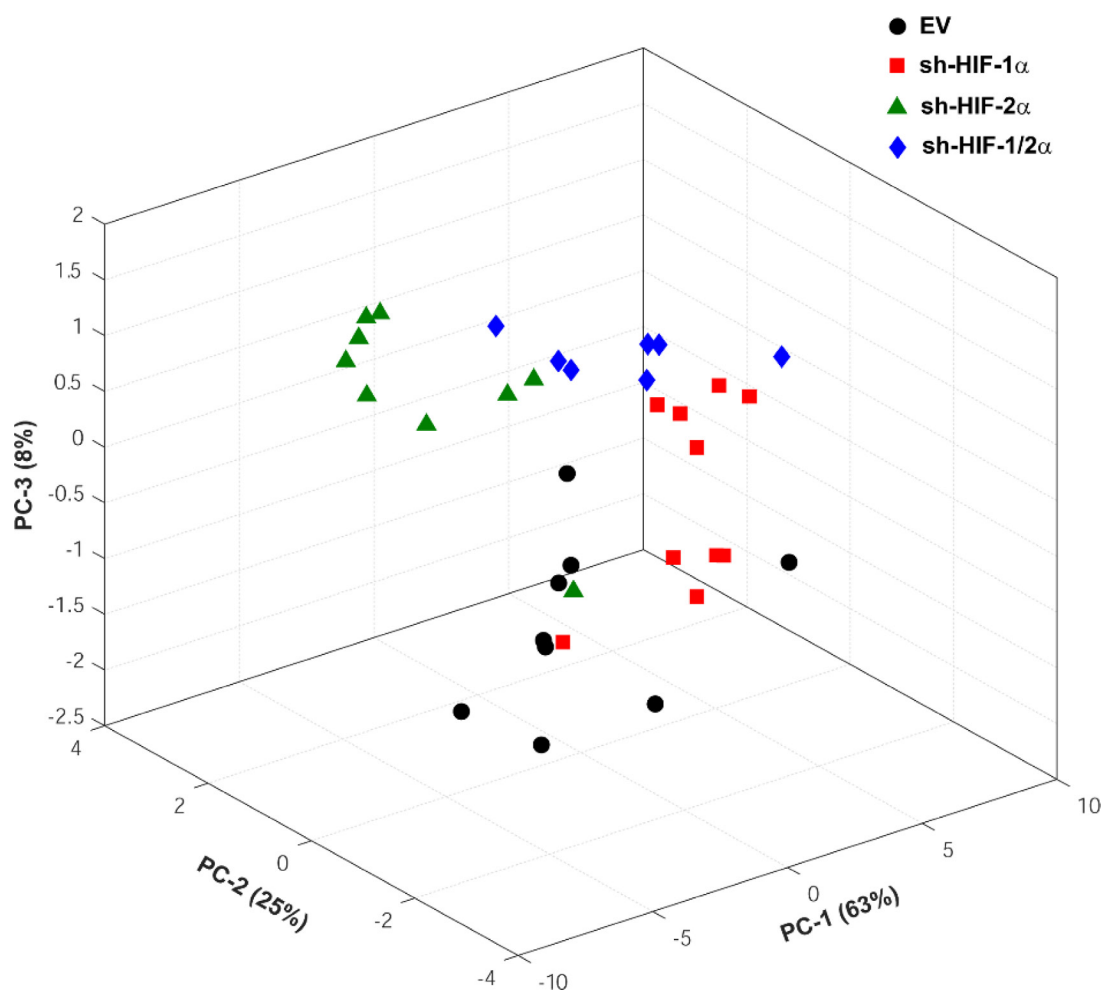

**Supplementary Figure 1: Multivariate principal component analysis (PCA) of metabolites.** A three dimensional scatter score plot shows clear clustering of 231-EV (black dot), sh-HIF-1 $\alpha$  (red square), sh-HIF-2 $\alpha$  (green triangle), and sh-HIF-1/2 $\alpha$  (blue diamond) tumors.

**Supplementary Table 1: Metabolites identified and quantified in aqueous and lipid phase extracts of tumors derived from EV, sh-HIF-1 $\alpha$ , sh-HIF-2 $\alpha$  shRNA, sh-HIF-1/2 $\alpha$  cells**

| Metabolites   | Chem Shift    | EV            |                   | sh-HIF-1 $\alpha$ |                  | sh-HIF-2 $\alpha$    |                  |                   | sh-HIF-1/2 $\alpha$   |         |           |
|---------------|---------------|---------------|-------------------|-------------------|------------------|----------------------|------------------|-------------------|-----------------------|---------|-----------|
|               | ppm           | Avg           | $\pm$ SEM         | Avg               | $\pm$ SEM        | <sup>a</sup> P-value | Avg              | $\pm$ SEM         | <sup>#b</sup> P-value | Avg     | $\pm$ SEM |
| Amino Acids   | BCA           | 0.99          | 1.01 $\pm$ 0.10   | 1.03 $\pm$ 0.111  | (0.436)          | 0.96 $\pm$ 0.068     | (0.343)          | 0.88 $\pm$ 0.119  | (0.210)               |         |           |
|               | Valine        | 1.05          | 0.17 $\pm$ 0.018  | 0.19 $\pm$ 0.02   | (0.212)          | 0.17 $\pm$ 0.012     | (0.458)          | 0.16 $\pm$ 0.023  | (0.348)               |         |           |
|               | Alanine       | 1.48          | 1.21 $\pm$ 0.082  | 0.78 $\pm$ 0.09   | (0.002)          | 0.77 $\pm$ 0.056     | (0.001)          | 0.63 $\pm$ 0.086  | (0.000)               |         |           |
|               | Lysine        | 1.73          | 0.84 $\pm$ 0.05   | 0.76 $\pm$ 0.079  | (0.210)          | 0.84 $\pm$ 0.06      | (0.467)          | 0.73 $\pm$ 0.10   | (0.153)               |         |           |
|               | Glutamate     | 2.35          | 1.84 $\pm$ 0.096  | 1.29 $\pm$ 0.16   | (0.005)          | 2.15 $\pm$ 0.15      | (0.052)          | 1.16 $\pm$ 0.135  | (0.000)               |         |           |
|               | Glutamine     | 2.45          | 0.53 $\pm$ 0.054  | 0.40 $\pm$ 0.039  | (0.033)          | 0.63 $\pm$ 0.044     | (0.083)          | 0.44 $\pm$ 0.043  | (0.118)               |         |           |
|               | Aspartate     | 2.80          | 0.16 $\pm$ 0.014  | 0.07 $\pm$ 0.018  | (0.000)          | 0.15 $\pm$ 0.019     | (0.245)          | 0.05 $\pm$ 0.018  | (0.000)               |         |           |
|               | Glycine       | 3.57          | 0.76 $\pm$ 0.067  | 0.40 $\pm$ 0.046  | (0.001)          | 0.81 $\pm$ 0.073     | (0.317)          | 0.44 $\pm$ 0.055  | (0.002)               |         |           |
|               | Tyrosine      | 6.90          | 0.04 $\pm$ 0.005  | 0.04 $\pm$ 0.005  | (0.185)          | 0.03 $\pm$ 0.005     | (0.133)          | 0.03 $\pm$ 0.003  | (0.025)               |         |           |
|               | Phenylalanine | 7.41          | 0.08 $\pm$ 0.01   | 0.09 $\pm$ 0.009  | (0.253)          | 0.07 $\pm$ 0.004     | (0.239)          | 0.07 $\pm$ 0.008  | (0.284)               |         |           |
| Organic Acids | Histidine     | 7.69          | 0.01 $\pm$ 0.004  | 0.01 $\pm$ 0.004  | (0.330)          | 0.007 $\pm$ 0.002    | (0.212)          | 0.01 $\pm$ 0.004  | (0.321)               |         |           |
|               | Lactate       | 1.34          | 6.87 $\pm$ 0.702  | 6.23 $\pm$ 0.719  | (0.269)          | 5.56 $\pm$ 0.347     | (0.057)          | 6.10 $\pm$ 0.885  | (0.250)               |         |           |
|               | Acetate       | 1.92          | 0.26 $\pm$ 0.068  | 0.16 $\pm$ 0.024  | (0.079)          | 0.13 $\pm$ 0.019     | (0.038)          | 0.11 $\pm$ 0.022  | (0.042)               |         |           |
|               | Fumarate      | 6.51          | 0.005 $\pm$ 0.001 | 0.003 $\pm$ 0.001 | (0.222)          | 0.004 $\pm$ 0.001    | (0.308)          | 0.002 $\pm$ 0.001 | (0.052)               |         |           |
|               | Formate       | 8.45          | 0.06 $\pm$ 0.019  | 0.056 $\pm$ 0.009 | (0.429)          | 0.042 $\pm$ 0.005    | (0.193)          | 0.042 $\pm$ 0.012 | (0.240)               |         |           |
|               | Pyruvate      | 2.40          | 0.33 $\pm$ 0.034  | 0.25 $\pm$ 0.037  | (0.067)          | 0.31 $\pm$ 0.016     | (0.276)          | 0.23 $\pm$ 0.024  | (0.022)               |         |           |
|               | Choline       | 3.21          | 0.79 $\pm$ 0.111  | 0.61 $\pm$ 0.084  | (0.108)          | 0.83 $\pm$ 0.069     | (0.358)          | 0.57 $\pm$ 0.064  | (0.073)               |         |           |
|               | Cholines      | PC            | 3.22              | 2.90 $\pm$ 0.195  | 1.79 $\pm$ 0.237 | (0.001)              | 4.77 $\pm$ 0.51  | (0.002)           | 3.07 $\pm$ 0.325      | (0.325) |           |
|               |               | GPC           | 3.24              | 3.45 $\pm$ 0.284  | 1.97 $\pm$ 0.318 | (0.002)              | 2.30 $\pm$ 0.195 | (0.002)           | 1.28 $\pm$ 0.183      | (0.000) |           |
|               |               | Total-Choline | 3.22              | 6.81 $\pm$ 0.469  | 4.16 $\pm$ 0.537 | (0.001)              | 7.54 $\pm$ 0.596 | (0.176)           | 4.67 $\pm$ 0.506      | (0.004) |           |
| Creatine      |               | 3.04          | 0.50 $\pm$ 0.044  | 0.39 $\pm$ 0.032  | (0.025)          | 0.79 $\pm$ 0.069     | (0.001)          | 0.59 $\pm$ 0.064  | (0.113)               |         |           |
| Others        | Glucose       | 5.24          | 0.05 $\pm$ 0.018  | 0.02 $\pm$ 0.011  | (0.102)          | 0.07 $\pm$ 0.024     | (0.233)          | 0.08 $\pm$ 0.028  | (0.153)               |         |           |
|               | Glutathione   | 2.54          | 0.77 $\pm$ 0.048  | 0.64 $\pm$ 0.095  | (0.133)          | 0.99 $\pm$ 0.066     | (0.009)          | 0.52 $\pm$ 0.067  | (0.004)               |         |           |
|               | Taurine       | 3.43          | 2.83 $\pm$ 0.17   | 2.10 $\pm$ 0.197  | (0.007)          | 4.17 $\pm$ 0.326     | (0.001)          | 2.44 $\pm$ 0.359  | (0.155)               |         |           |
|               | Myo-inositol  | 4.06          | 0.79 $\pm$ 0.064  | 0.27 $\pm$ 0.038  | (0.001)          | 0.51 $\pm$ 0.05      | (0.002)          | 0.33 $\pm$ 0.045  | (0.000)               |         |           |
| Nucleotides   | Uracil        | 5.80          | 0.009 $\pm$ 0.002 | 0.008 $\pm$ 0.002 | (0.966)          | 0.002 $\pm$ 0.001    | (0.033)          | 0.001 $\pm$ 0.001 | (0.015)               |         |           |
|               | Adenosine     | 8.36          | 0.06 $\pm$ 0.007  | 0.06 $\pm$ 0.01   | (0.395)          | 0.04 $\pm$ 0.006     | (0.025)          | 0.04 $\pm$ 0.009  | (0.151)               |         |           |
|               | UDP-N-AcGln+  | 5.51          | 0.047 $\pm$ 0.004 | 0.015 $\pm$ 0.007 | (0.001)          | 0.04 $\pm$ 0.006     | (0.183)          | 0.01 $\pm$ 0.007  | (0.000)               |         |           |
|               | NADP          | 9.32          | 0.03 $\pm$ 0.003  | 0.02 $\pm$ 0.004  | (0.003)          | 0.02 $\pm$ 0.003     | (0.009)          | 0.01 $\pm$ 0.002  | (0.000)               |         |           |
|               | ATP/ADP       | 8.51          | 0.17 $\pm$ 0.019  | 0.05 $\pm$ 0.013  | (0.000)          | 0.12 $\pm$ 0.006     | (0.015)          | 0.06 $\pm$ 0.014  | (0.000)               |         |           |
| Unidentified  | UNK-4.20      | 4.17          | 0.97 $\pm$ 0.059  | 0.67 $\pm$ 0.08   | (0.004)          | 1.48 $\pm$ 0.138     | (0.002)          | 0.95 $\pm$ 0.09   | (0.425)               |         |           |
|               | UNK-6.15      | 6.15          | 0.26 $\pm$ 0.026  | 0.088 $\pm$ 0.025 | (0.000)          | 0.26 $\pm$ 0.022     | (0.497)          | 0.134 $\pm$ 0.033 | (0.003)               |         |           |
|               | UNK-6.8       | 6.80          | 0.016 $\pm$ 0.001 | 0.003 $\pm$ 0.001 | (0.000)          | 0.024 $\pm$ 0.002    | (0.006)          | 0.01 $\pm$ 0.002  | (0.028)               |         |           |
|               | UNK-7.70      | 7.70          | 0.001 $\pm$ 0.001 | 0.04 $\pm$ 0.003  | (0.000)          | 0.025 $\pm$ 0.017    | (0.08)           | 0.04 $\pm$ 0.03   | (0.056)               |         |           |
|               | UNK-8.27      | 8.27          | 0.25 $\pm$ 0.02   | 0.105 $\pm$ 0.017 | (0.000)          | 0.241 $\pm$ 0.017    | (0.385)          | 0.134 $\pm$ 0.025 | (0.002)               |         |           |

Student *t*-test <sup>a</sup>; EV vs HIF-1 $\alpha$  shRNA, <sup>#b</sup>; EV vs HIF-2 $\alpha$  shRNA, C; EV vs HIF-1 $\alpha$ +2 $\alpha$  shRNA, +UDP-N-Acetyl Glucosamine  
 Values represent Mean  $\pm$  SEM. A one-tailed student t-test was performed on quantified integral peak areas. *P*-values < 0.05 were considered statistically significant. Peak integral areas were normalized to sample weight and dilution factors used during the experimental procedures.
